# Supplementary material
Source: PubMed Central journal article supplement (PMC3944428)
Supplement: NIHMS551782-supplement-2.pdf [file NIHMS551782-supplement-2.pdf]

## Supplementary Tables

**Supplementary Table 1. Antibody List.**

| Target                       | Primary antiserum                                   | Secondary antiserum                                             |
|------------------------------|-----------------------------------------------------|-----------------------------------------------------------------|
| Acetylated $\alpha$ -tubulin | mouse, 1:500, Sigma-Aldrich (T6793)                 | Alexa Fluor® 568-labeled goat IgG2b, 1:500, Invitrogen (A21144) |
| $\gamma$ -tubulin            | mouse, 1:100, Sigma-Aldrich (T5326)                 | Alexa Fluor® 488-labeled goat IgG1, 1:100, Invitrogen (A21121)  |
| Gli2                         | rabbit, 1:200, Abcam (ab26056)                      | Alexa Fluor® 488-labeled goat IgG, 1:1000, Invitrogen (A11034)  |
| Smoothened                   | rabbit, 1:500, Abcam (ab72130)                      | Alexa Fluor® 488-labeled goat IgG, 1:1000, Invitrogen (A11034)  |
| Smoothened (biotinylation)   | rabbit, 1:700, Abcam (ab38686)                      | goat, 1:4000, Santa Cruz (SC-2004)                              |
| Paxillin                     | mouse, 1:150, BD Transduction Laboratories (610619) | Alexa Fluor® 488-labeled goat, 1:500, Invitrogen (A11029)       |

**Supplementary Table 2. PCR Primers.**

| Gene | Accession number | Primer Sequence                                                                | Product Size |
|------|------------------|--------------------------------------------------------------------------------|--------------|
| Gli1 | NM_001191910     | forward 5'-TATGTCAGGGTCCCAGGGTTATG-3'<br>reverse 5'-GAGCCCGCTTCTTAGTCAGTTTG-3' | 110 bp       |
