# Supplementary material
Source: PubMed Central journal article supplement (PMC3944428)

# Supplementary Fig. 1.

**A**

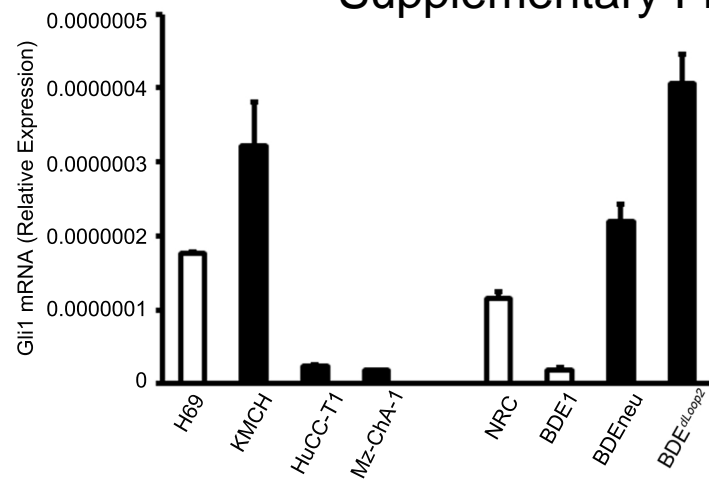

**B**

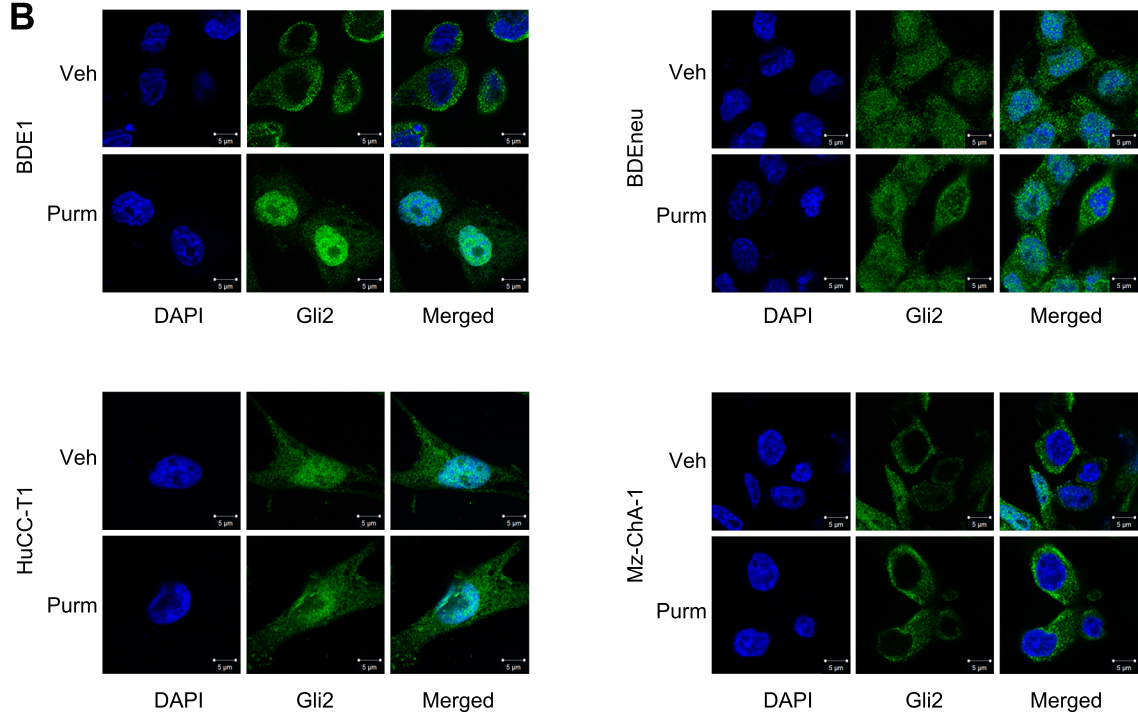

Supplement: NIHMS551782-supplement-1.pdf [file NIHMS551782-supplement-1.pdf]
